# Supplementary material
Source: Springer Nature journal article supplement (http://publikationen.ub.uni-frankfurt.de/opus4/files/868/12860_2007_21_MOESM1_ESM.pdf)

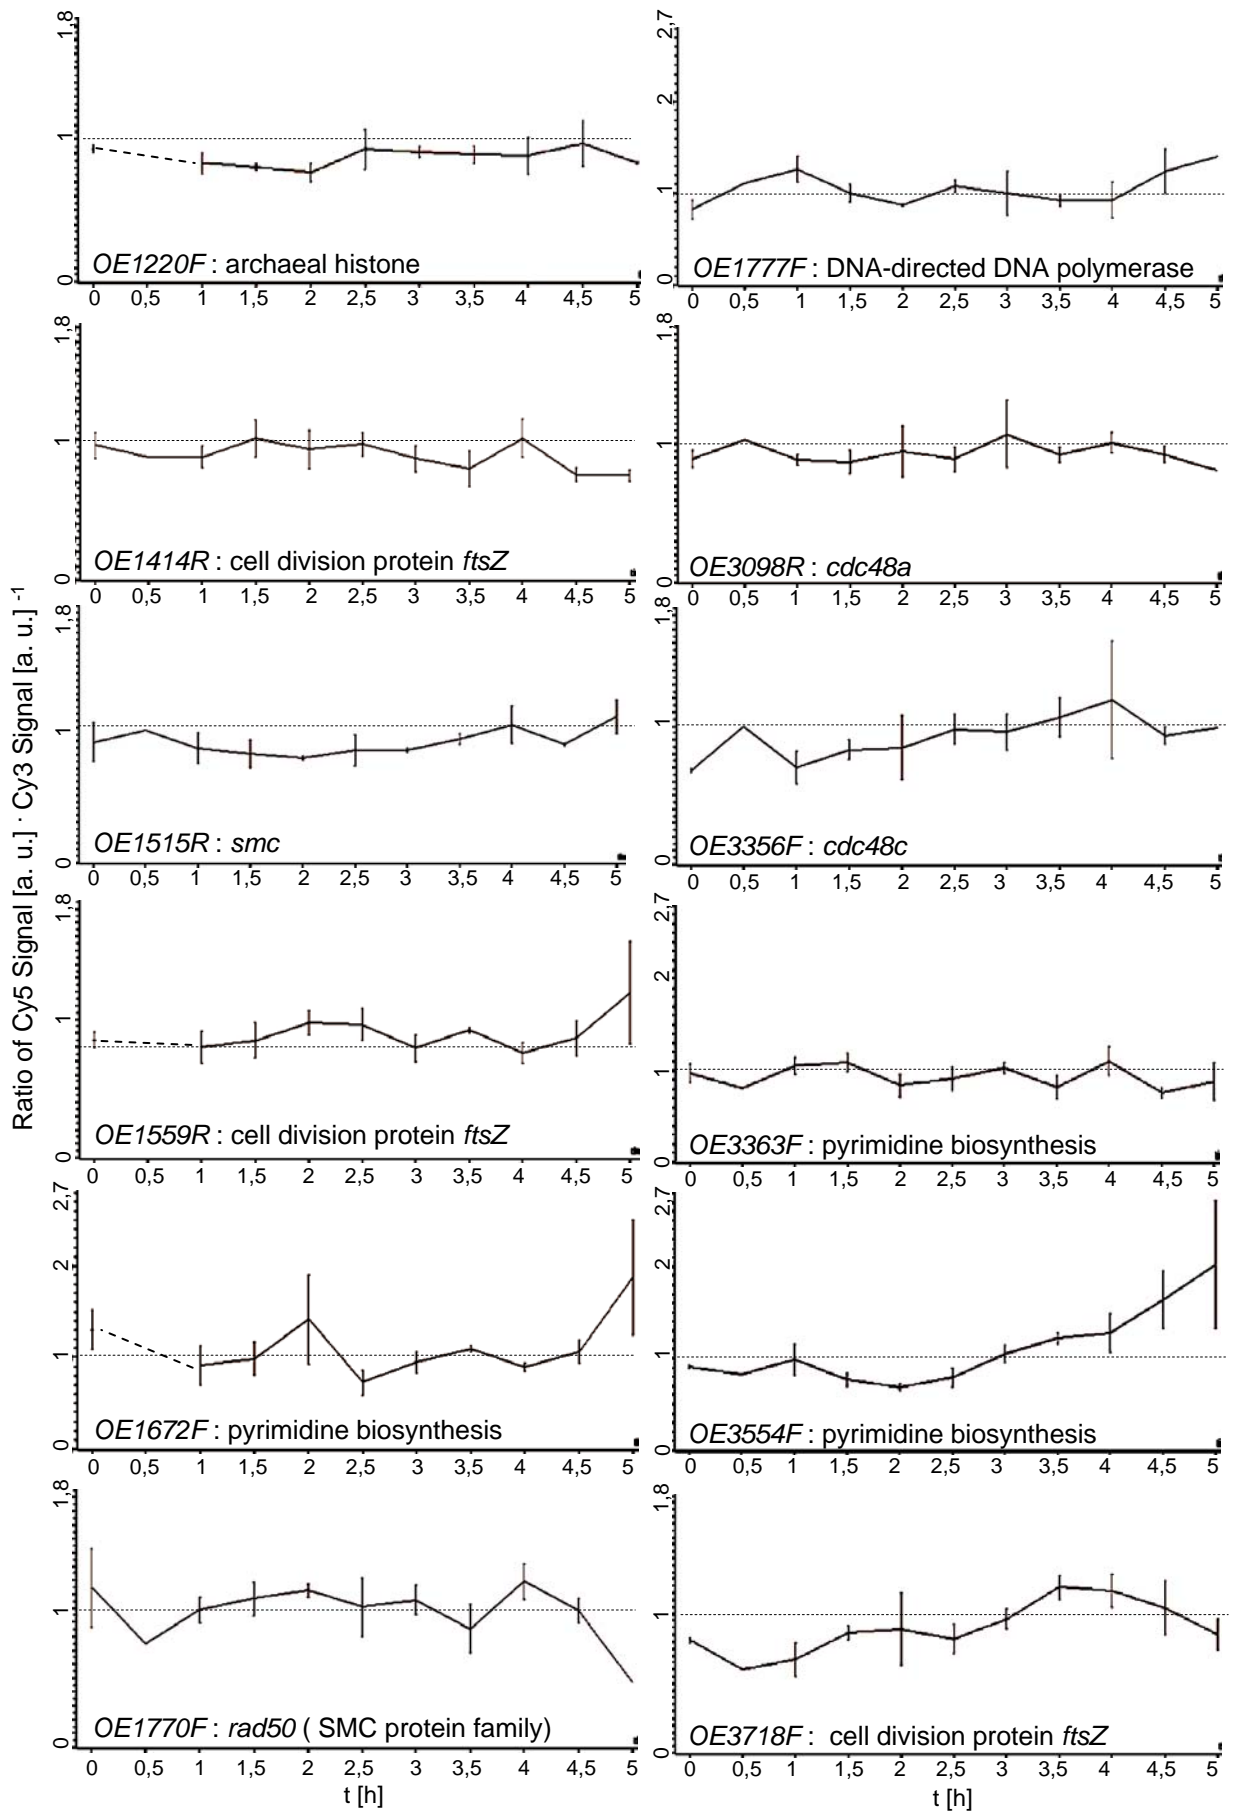

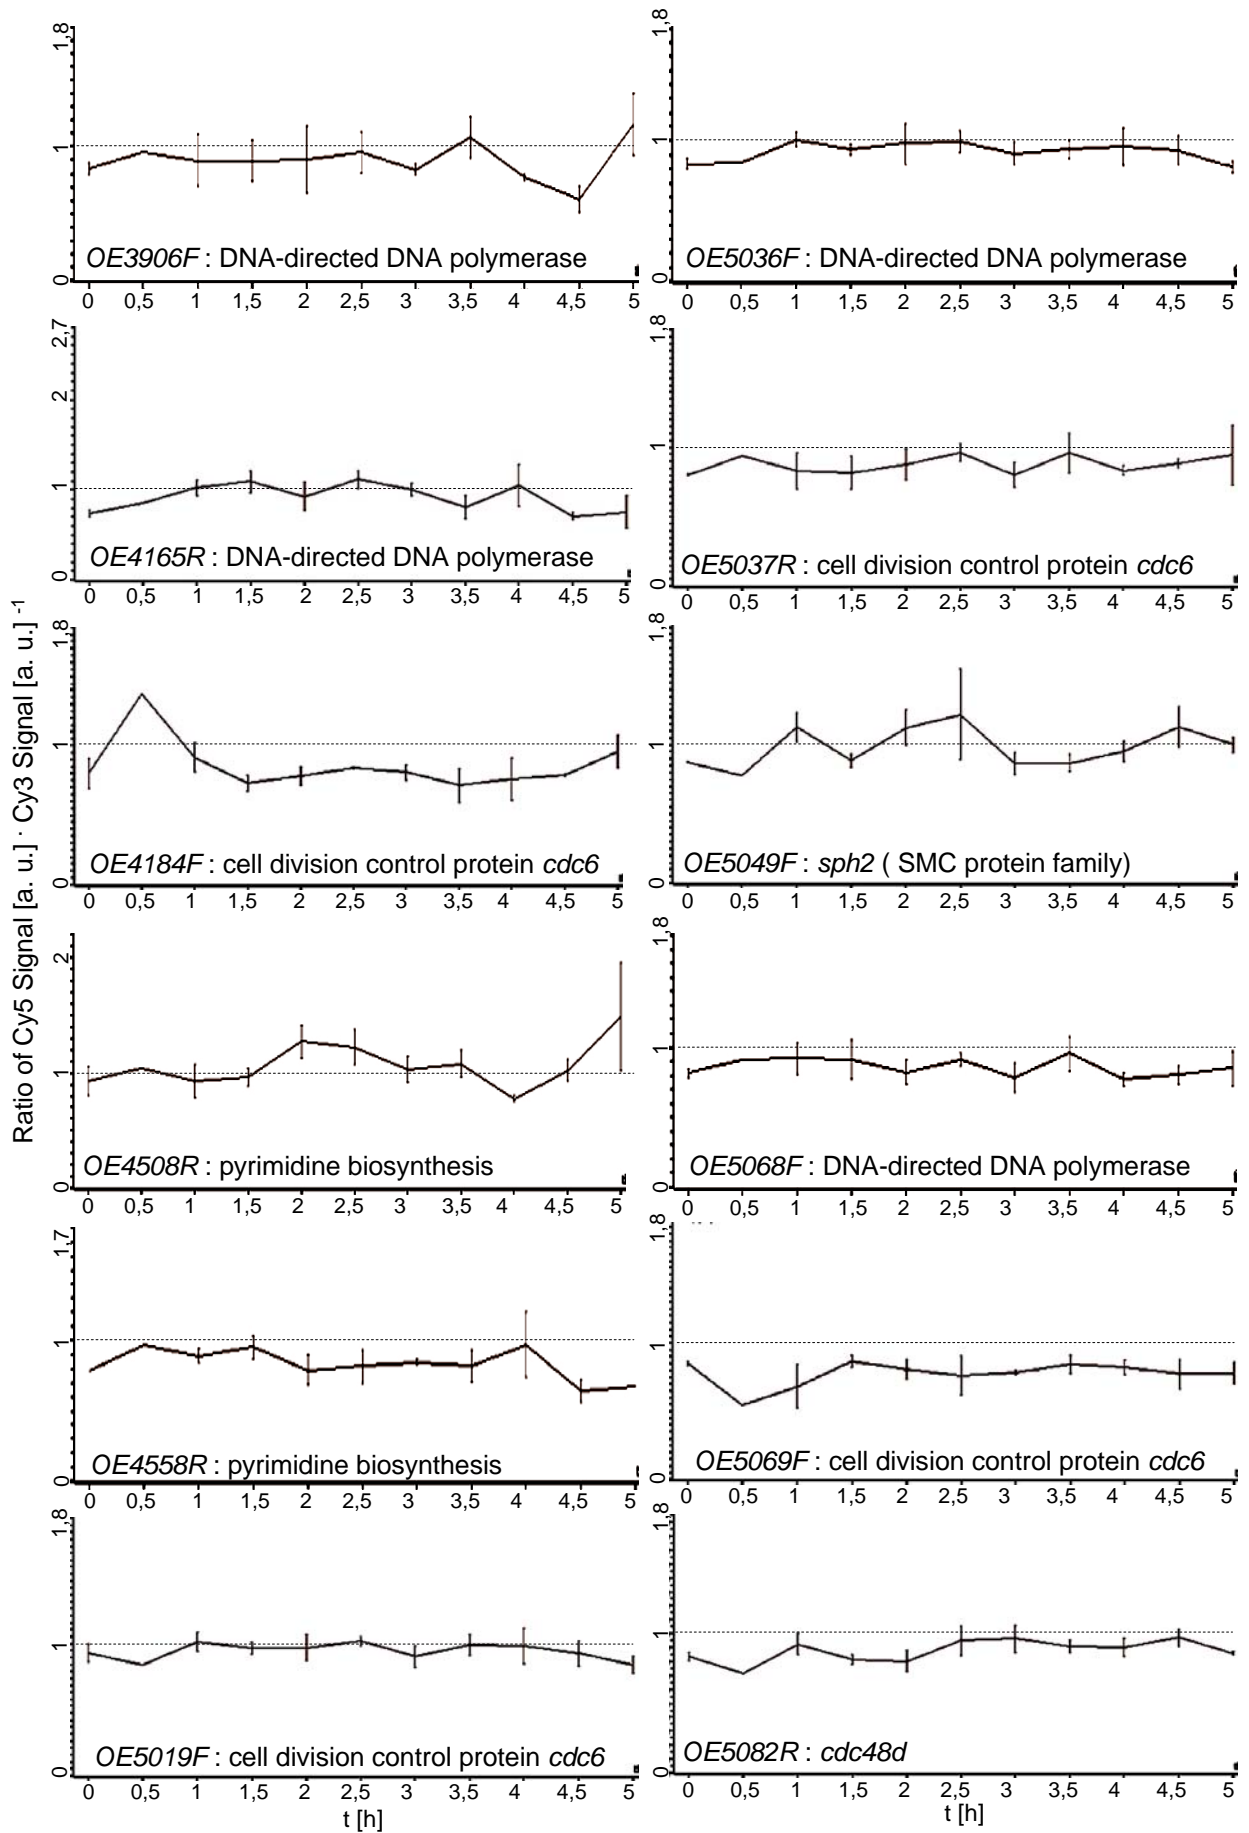

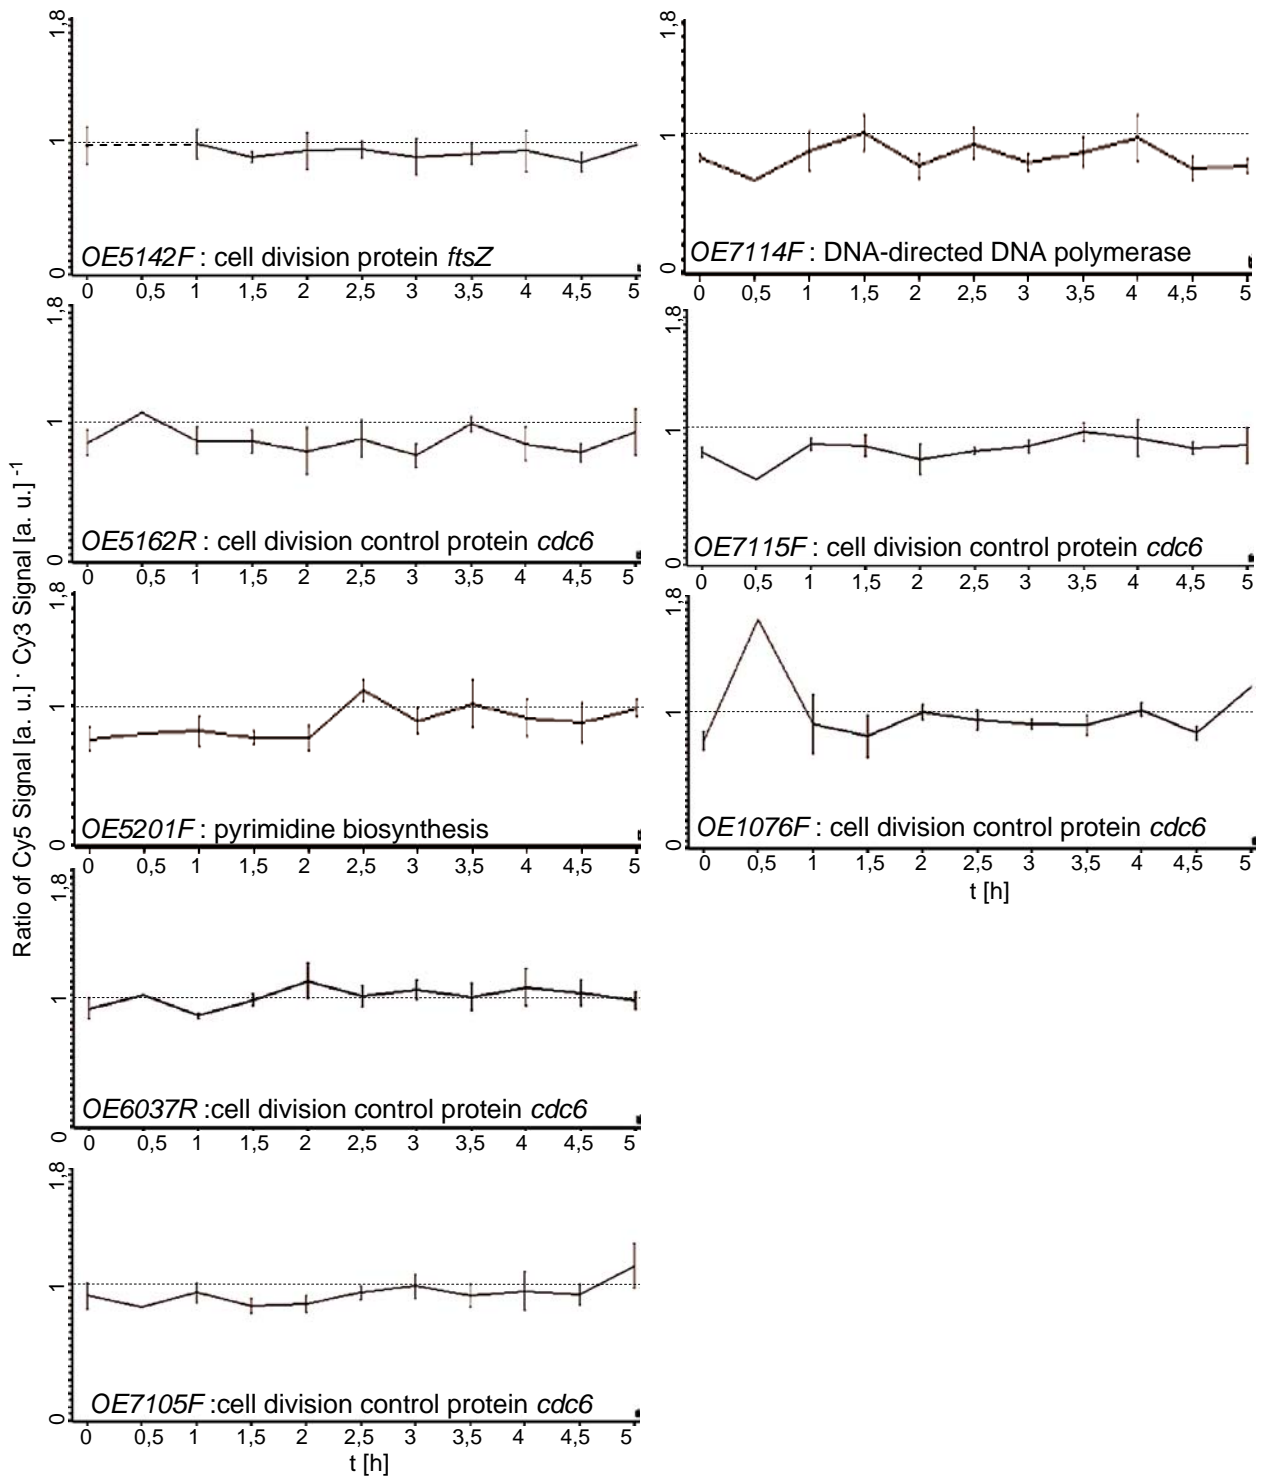

Supplement: MOESM1 [file 12860_2007_21_MOESM1_ESM.pdf]
